# Supplementary material for: A novel codon-based de Bruijn graph algorithm for gene construction from unassembled transcriptomes
Source: PubMed Central journal article supplement (PMC5114782; doi:10.1186/s13059-016-1094-x), 2016-11-17
Supplement: 13059_2016_1094_MOESM1_ESM.pdf [file 13059_2016_1094_MOESM1_ESM.pdf]

## Supplementary Method

### Mathematically comparison between the codon-based *de Bruijn* graph and the traditional *de Bruijn* graph

The codon-based *de Bruijn* graph is fundamentally different with the traditional *de Bruijn* graph and has much lower level of complexity and memory usage. In this part, we mathematically prove these advantages of the codon-based *de Bruijn* graph. First, the inputted reads are split into kmers, and for each graph, the number of kmers are:

$$NV(g) = \begin{cases} n(l - k + 1), & \text{if } g = G(V, E) \\ \frac{n(l - k + 1)}{3}, & \text{if } g = CG(V, E) \end{cases} \quad (1)$$

Where  $n$  is the total number of reads,  $l$  is the read length,  $k$  is the kmer length,  $G(V, E)$  is the traditional *de Bruijn* graph and  $CG(V, E)$  is the codon-based *de Bruijn* graph. Considering the repeated kmers, the number of kmers in reality should be less than  $NV(g)$ . Let  $A$  to be a set of kmers and the number of kmers in  $A$  is  $a_n$ . When a new kmer is added to  $A$ , the probability of this kmer is already contained by  $A$  is  $\frac{a_n}{4^k}$ . Therefore, for each graph, the expected kmer number is:

$$NV(g) = \begin{cases} 4^k - (4^k - 1) \left(1 - \frac{1}{4^k}\right)^{n(l-k+1)-1}, & \text{if } g = G(V, E) \\ 4^k - (4^k - 1) \left(1 - \frac{1}{4^k}\right)^{\frac{n(l-k+1)}{3}-1}, & \text{if } g = CG(V, E) \end{cases} \quad (2)$$

It is apparent that the codon-based *de Bruijn* graph contains fewer nodes than the traditional *de Bruijn* graph.

The fraction of branch nodes with out-degree larger than two in the graph largely reflects its complexity. We use  $E$  represents the edges which are formed by these branch nodes. For a directed edge,

(i) both head and tail are derived from the same read [13]

For a read, a branch edge appears once with the phenomenon of a repeat node (kmer) in the same read. For  $n$  reads, integrating these with the above mentioned (1), (2),

$$E_1 = \begin{cases} n(l - k + 1) - [4^k - (4^k - 1) \left(1 - \frac{1}{4^k}\right)^{n(l-k+1)-1}], & \text{if } G = G(V, E) \\ \frac{n(l - k + 1)}{3} - [4^k - (4^k - 1) \left(1 - \frac{1}{4^k}\right)^{\frac{n(l-k+1)}{3}-1}], & \text{if } G = CG(V, E) \end{cases}$$

(ii) head and tail are derived from different reads

As we know, the probability of forming an edge is  $\frac{1}{4^{k-1}}$  when two kmers in  $G(v, e)$ ,  $\frac{1}{4^{k-3}}$  in  $CG(v, e)$ . Theoretically, for a kmer in a read, the  $(n - 1)(l - k + 1)$  kmers, which are cut by the other  $n - 1$  reads, can link this kmer to a directed edge ignoring the repeat kmers in

$G(v, e), \frac{(n-1)(l-k+1)}{3}$  in  $CG(v, e)$ . Because a directed edge is only calculated once when a kmer is linked to the same repeat kmers, we get the  $G(e)$  only by computing the number of all kmers cut by the other  $n - 1$  reads considering the repeat kmers. By integrating these with the above equation (2), for one read,

$$e = \begin{cases} 4^{k-1} - (4^{k-1} - 1) \left(1 - \frac{1}{4^{k-1}}\right)^{(n-1)(l-k+1)-1}, & \text{if } G = G(V, E) \\ 4^{k-3} - (4^{k-3} - 1) \left(1 - \frac{1}{4^{k-3}}\right)^{\frac{(n-1)(l-k+1)-1}{3}}, & \text{if } G = CG(V, E) \end{cases}$$

for  $n$  reads,

$$G(E) = E_1 + ne$$

$$= \begin{cases} n(l-k+1) - [4^k - (4^k - 1) \left(1 - \frac{1}{4^k}\right)^{n(l-k+1)-1}] + n[4^{k-1} - (4^{k-1} - 1) \left(1 - \frac{1}{4^{k-1}}\right)^{(n-1)(l-k+1)-1}], & \text{if } G = G(V, E) \\ \frac{n(l-k+1)}{3} - \left[4^k - (4^k - 1) \left(1 - \frac{1}{4^k}\right)^{\frac{n(l-k+1)-1}{3}}\right] + n[4^{k-3} - (4^{k-3} - 1) \left(1 - \frac{1}{4^{k-3}}\right)^{\frac{(n-1)(l-k+1)-1}{3}}], & \text{if } G = CG(V, E) \end{cases}$$

Set

$$f(x) = \frac{n(l-k+1)}{i} - \left[4^k - (4^k - 1) \left(1 - \frac{1}{4^k}\right)^{\frac{n(l-k+1)-1}{x}}\right] + n[4^{k-x} - (4^{k-x} - 1) \left(1 - \frac{1}{4^{k-x}}\right)^{\frac{(n-1)(l-k+1)-1}{x}}]$$

So,

$$f'(x) = -\frac{n(l-k+1)}{x^2} - n(l-k+1)(4^k - 1) \ln\left(1 - \frac{1}{4^k}\right) \left(1 - \frac{1}{4^k}\right)^{\frac{n(l-k+1)-1}{x} - 1} \frac{1}{x^2} - nx4^{k-x} \ln 4 - n(4^{k-x} - 1) \left(1 - \frac{1}{4^{k-x}}\right)^{\frac{(n-1)(l-k+1)-1}{x} - 1} \left[\frac{1}{4^x - 4^k} 4^k \ln 4 + (n-1)(l-k+1)4^x \frac{\ln 4}{4^x - 4^k} \frac{1}{x} - (n-1)(l-k+1) \ln\left(1 - \frac{1}{4^{k-x}}\right) \frac{1}{x^2}\right]$$

$$f'(3) = -\frac{n(l-k+1)}{9} - \frac{1}{9}n(l-k+1)(4^k - 1) \ln\left(1 - \frac{1}{4^k}\right) \left(1 - \frac{1}{4^k}\right)^{\frac{n(l-k+1)-1}{3} - 1} - \frac{3}{64}n4^k \ln 4 - n\left(\frac{4^k}{64} - 1\right) \left(1 - \frac{64}{4^k}\right)^{\frac{(n-1)(l-k+1)-1}{3} - 1} \left[\frac{1}{64 - 4^k} 4^k \ln 4 + \frac{64}{3}(n-1)(l-k+1) \ln 4 \frac{1}{64 - 4^k} - \frac{1}{9}(n-1)(l-k+1) \ln\left(1 - \frac{64}{4^k}\right)\right]$$

Typically  $\ln\left(1 - \frac{64}{4^k}\right) \approx 0$ ,  $\ln\left(1 - \frac{1}{4^k}\right) \approx 0$ , and thus,

$$\begin{aligned}
f'(3) &= -\frac{n(l-k+1)}{9} - (n-1)(l-k+1) \left(1 - \frac{64}{4^k}\right)^{\frac{(n-1)(l-k+1)}{3}-1} \\
&\quad - \frac{3}{64} n 4^k \ln 4 \left[ 1 - \frac{\left(1 - \frac{64}{4^k}\right)^{\frac{(n-1)(l-k+1)}{3}-1}}{3} - \frac{1}{9} \frac{(n-1)(l-k+1)}{4^{k-3}} \right] \\
&\approx -\frac{n(l-k+1)}{9} - (n-1)(l-k+1) - \frac{3}{64} n 4^k \ln 4 \left[ \frac{2}{3} - \frac{1}{9} \frac{(n-1)(l-k+1)}{4^{k-3}} \right]
\end{aligned}$$

In practice,  $n < 10^8$ ,  $l \in [50,150]$ ,

Meanwhile, the  $k$  value is set to larger than 20 universally. So,  $4^{k-3} > (n-1)(l-k+1)$

So,

$$\begin{aligned}
f'(3) &\approx -\frac{n(l-k+1)}{9} - (n-1)(l-k+1) - \frac{3}{64} n 4^k \ln 4 \left[ \frac{2}{3} - \frac{1}{9} \frac{(n-1)(l-k+1)}{4^{k-3}} \right] \approx -\frac{n(l-k+1)}{9} - (n-1)(l-k+1) \\
&\quad - \frac{5}{3} n 4^{k-3} \ln 4 < 0 \quad (4)
\end{aligned}$$

Therefore, we conclude that the edge number of the codon-based *de Bruijn* graph is much fewer than that of the traditional *de Bruijn* graph. Owing to its small number of nodes and edges, the codon-based *de Bruijn* graph saves traversing time and memory usage.

**Figure S1. Efficiency of SVM on removing false positive ORFs.** (A) The ROC curve of simulated RNA-seq datasets from chr3 of the human genome (hg19) after SVM filtration. (B) The ROC curve of simulated RNA-seq datasets from chr19 of the human genome (hg19) after SVM filtration. (C) The ROC curve of simulated RNA-seq datasets from chr20 of the human genome (hg19) after SVM filtration. (D) The ratio of positive and negative kmers in the simplified graph after tips trimming and bubbles merging on simulated RNA-seq datasets from chr3 of the human genome (hg19). (E) The ratio of positive and negative kmers in the simplified graph after tips trimming and bubbles merging on simulated RNA-seq datasets from chr19 of the human genome (hg19). (F) The rate of positive and negative kmers in the simplified graph after tips trimming and bubbles merging on simulated RNA-seq datasets from chr20 of the human genome (hg19).

**Figure S2. Influence of SVM filtration on the assembled CDSs.** inGAP-CDG predicted CDSs from a real RNA-seq dataset (SRR1045067) with or without SVM filtration in the algorithm. (A) The length distribution of predicted CDSs. (B) The mean, N50 and N90 length of predicted CDSs. (C) Comparison on the redundancy of predicted CDSs. (D) Comparison on the ROC curve. (E) Comparison on the gene fragmentation between the two approaches.

**Figure S3. Performance of inGAP-CDG on assembled transcripts.** The RNA-seq dataset (SRR1045067) was first assembled using Trinity, and the assembled long transcripts were then used for gene prediction by inGAP-CDG and TransDecoder, respectively. **(A)** The length distribution of the two methods. **(B)** The mean, N50 and N90 length of the two methods. **(C)** Comparison on the redundancy of predicted CDSs. **(D)** Comparison on the ROC curve. **(E)** Comparison on the gene fragmentation between the two methods.

**Figure S4. Robustness of inGAP-CDG over different sequencing read errors.** inGAP-CDG and eleven other pipelines predicted CDSs from three simulated RNA-seq dataset with different sequencing read errors read (0.5%, 1% and 2%), respectively. **(A)** Comparison on the redundancy of predicted CDSs. **(B)** Comparison on the sensitivity CDS prediction. **(C)** Comparison on the mean length of predicted CDSs. **(D)** Comparison on the error rate of predicted CDSs.

**Figure S5. Robustness of inGAP-CDG over different read length.** inGAP-CDG and eleven other pipelines predicted CDSs from three real RNA-seq datasets (ERR188040, ERR1161592, and SRR1045067) with different read length (75, 100 and 150 bp), respectively. **(A)** Comparison on the mean length of predicted CDSs. **(B)** Comparison on the sensitivity and specificity of true CDS prediction. **(C)** Comparison on the gene fragmentation among the nine methods. **(D)** Comparison on the redundancy of predicted CDSs.

**Figure S6. Four examples of constructed genes by inGAP-CDG and eight other pipelines.** Four human genes downloaded from NCBI were used as the reference genes, the predicted CDSs by inGAP-CDG and eight other pipelines were aligned to their reference genes, respectively. Black lines indicate the aligned fragments in the predicted CDSs. Green lines represent the unaligned fragments in the predicted CDSs. Notably, the pipelines using Trinity or Velvet as transcriptome assembler yielded a large number of fragmented and redundant CDS predictions. **(A)** XM\_011533632. **(B)** NM\_004168. **(C)** NM\_013379. **(D)** NM\_000018.

**Figure S7. Assessment of inGAP-CDG with three real RNA-seq data sets of *Drosophila melanogaster*.** inGAP-CDG and eleven other pipelines predicted CDSs from three real RNA-

seq data sets (SRR3331274, ERR3331275 and SRR3331276), respectively. Four metrics (mean length, sensitivity, redundancy and chimera rate) were used to assess the performance of inGAP-CDG and eleven other pipelines.

**Figure S8. A detailed pipeline of inGAP-CDG.**

**Figure S9. The workflow of six-frame translation.** The translated ORFs are sorted by length. Predicted ORFs were filtered following two different criteria (loose and strict).

**Figure S10. Traversing the codon-based *de Bruijn* graph.** (A, B) Tips in the codon-based *de Bruijn* graph. Tips are trimmed iteratively if their length  $\leq 2 * kmer$ . (C, D) Bubbles in the codon-based *de Bruijn* graph. The paths in a bubble are compared and their pairwise identity is calculated. If the identity reaches a cutoff of 95%, the longest path is reserved and all other paths are discarded. (E) rORFs can be served as landmarks for graph traversal. (F) A full-length CDS will be outputted if the CDS path is supported by the rORFs.

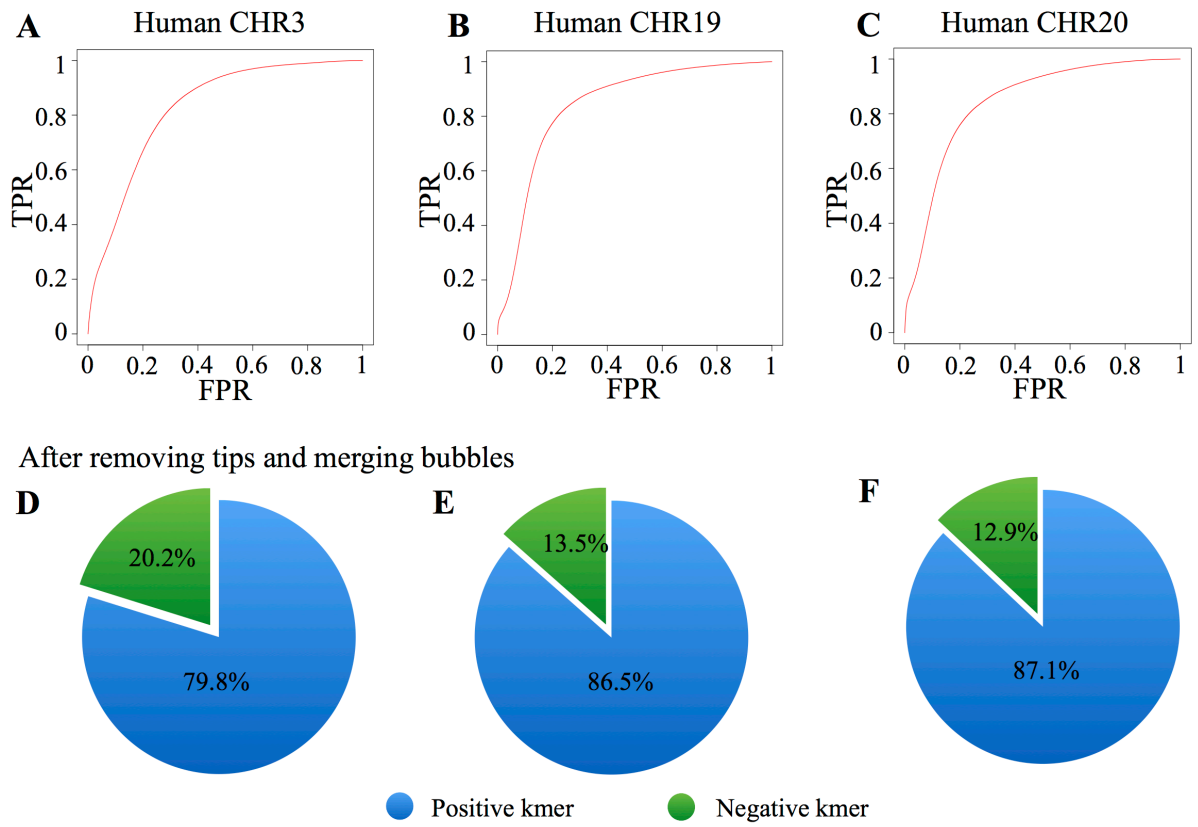

**Figure S1**

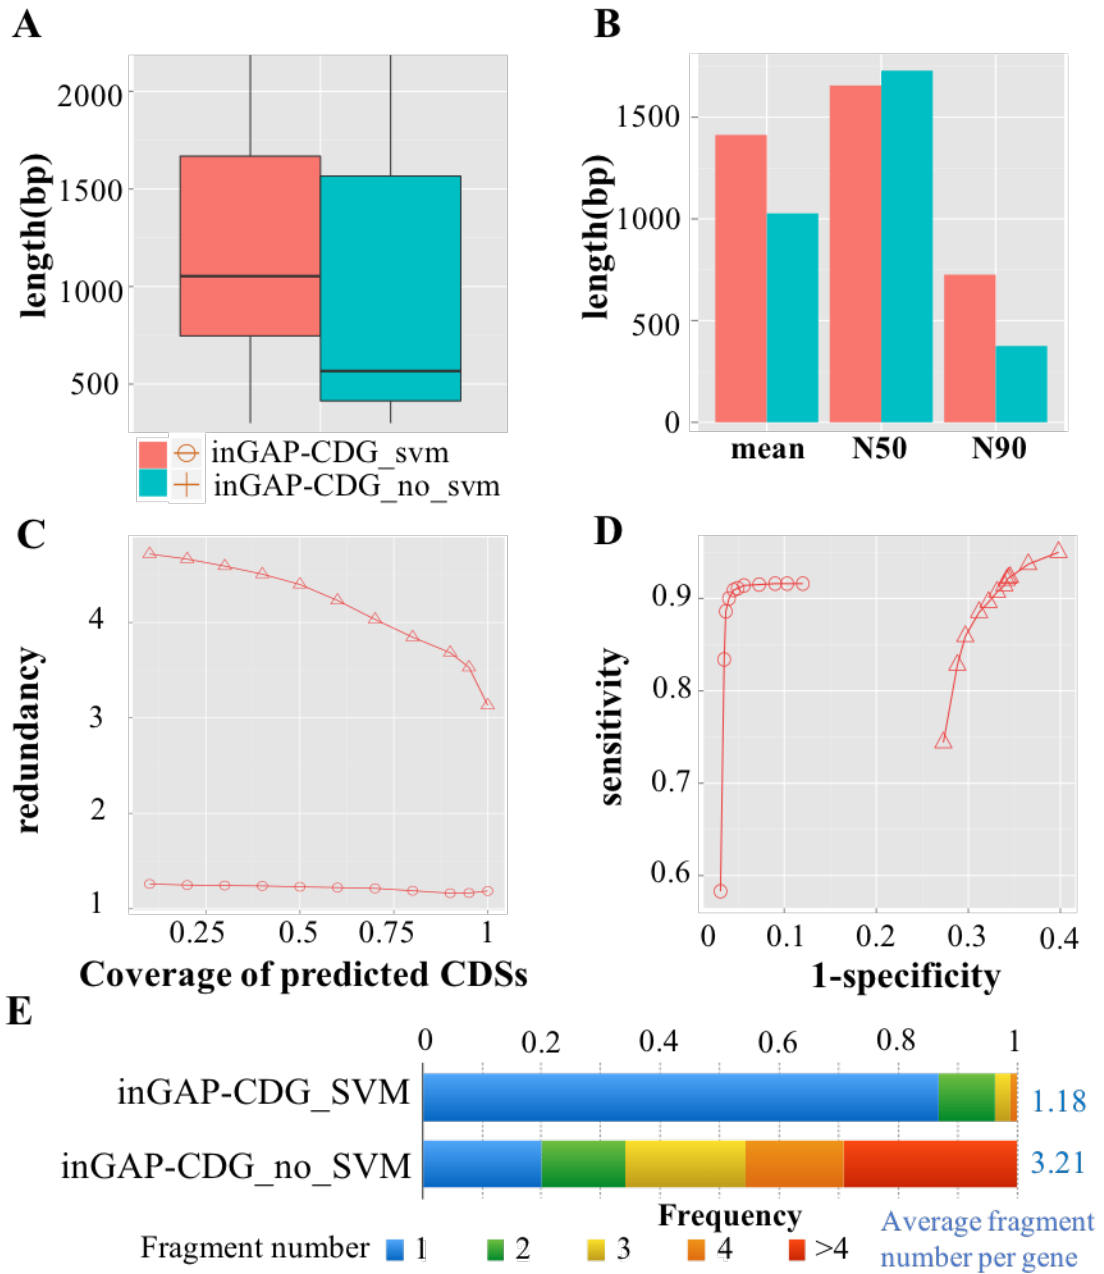

Figure S2

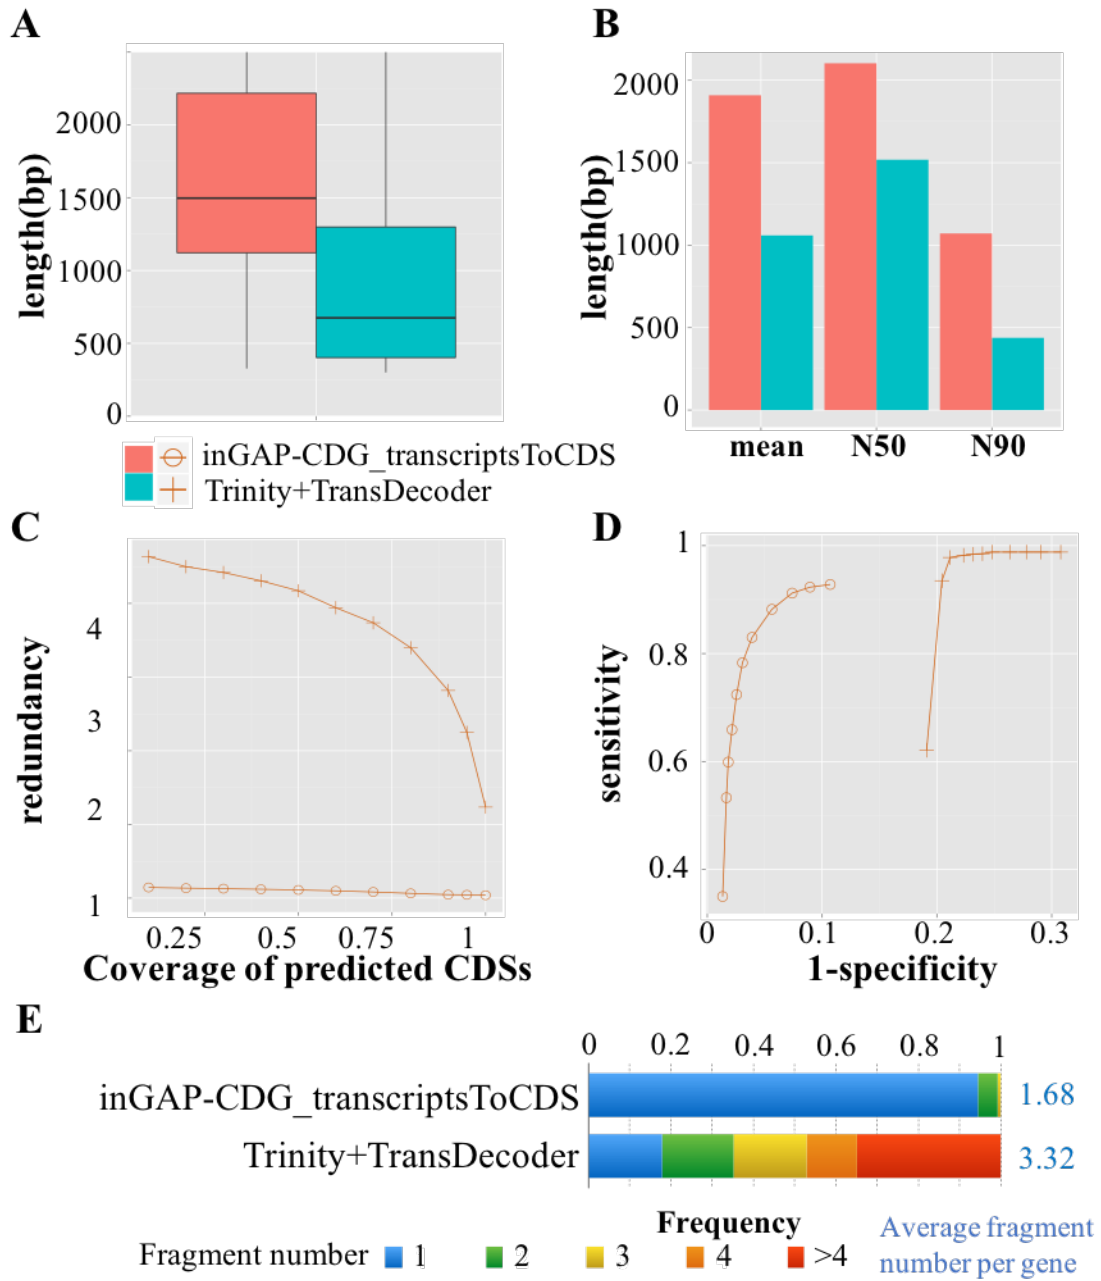

Figure S3



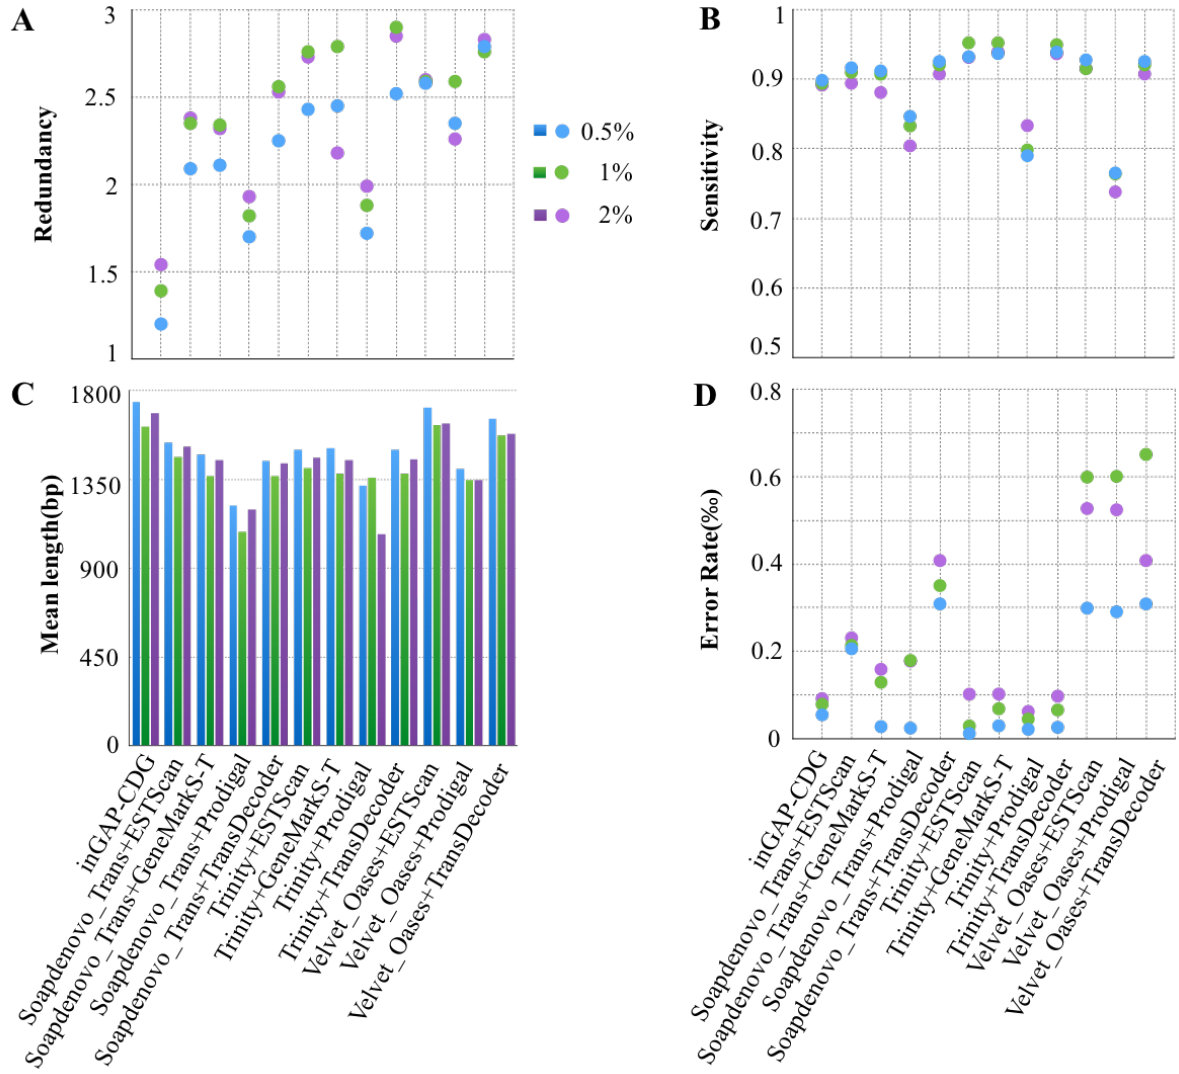

Figure S4

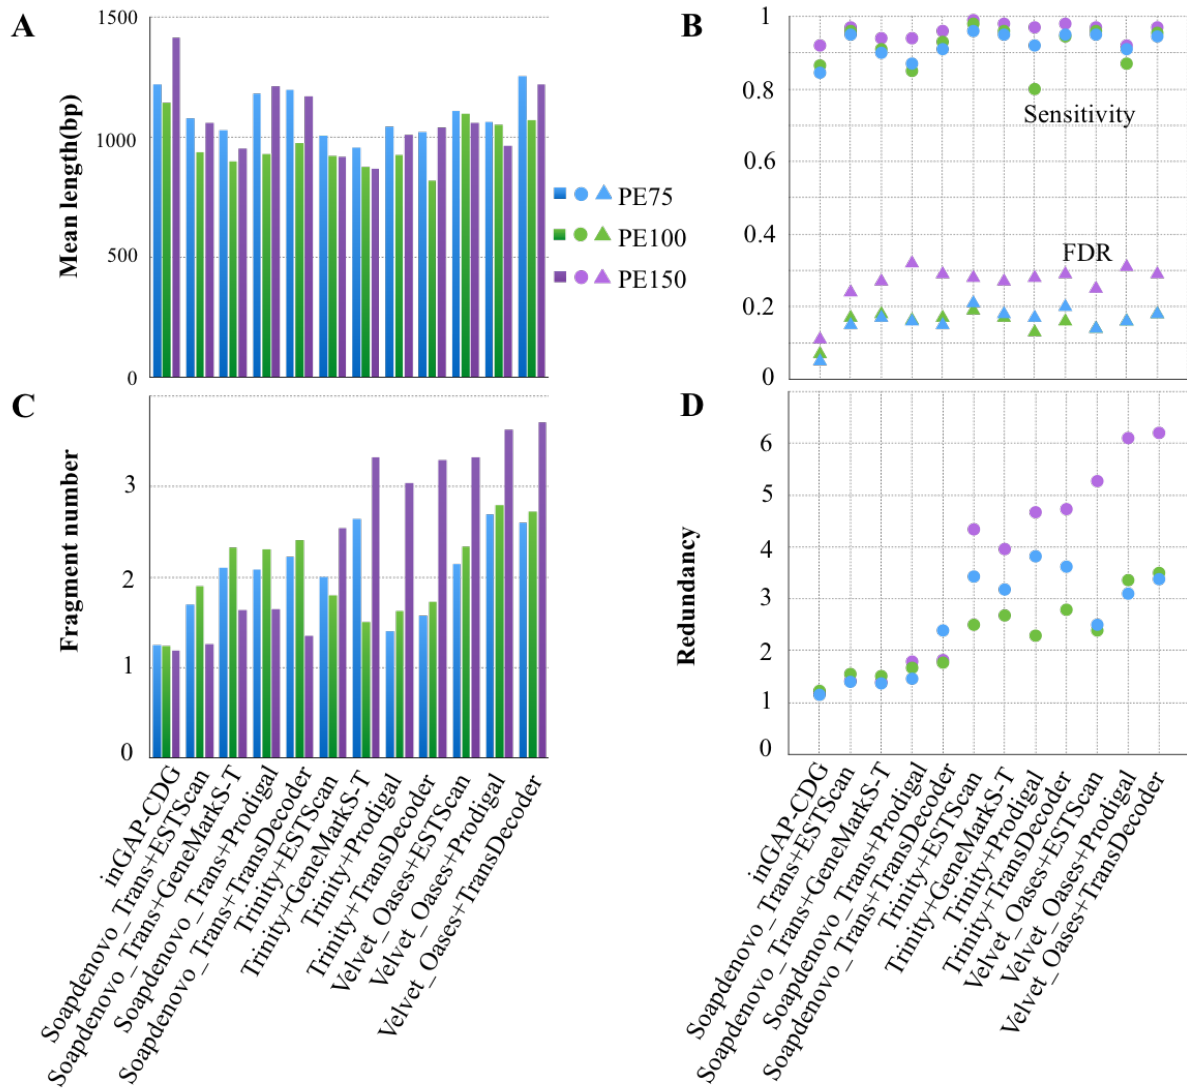

Figure S5

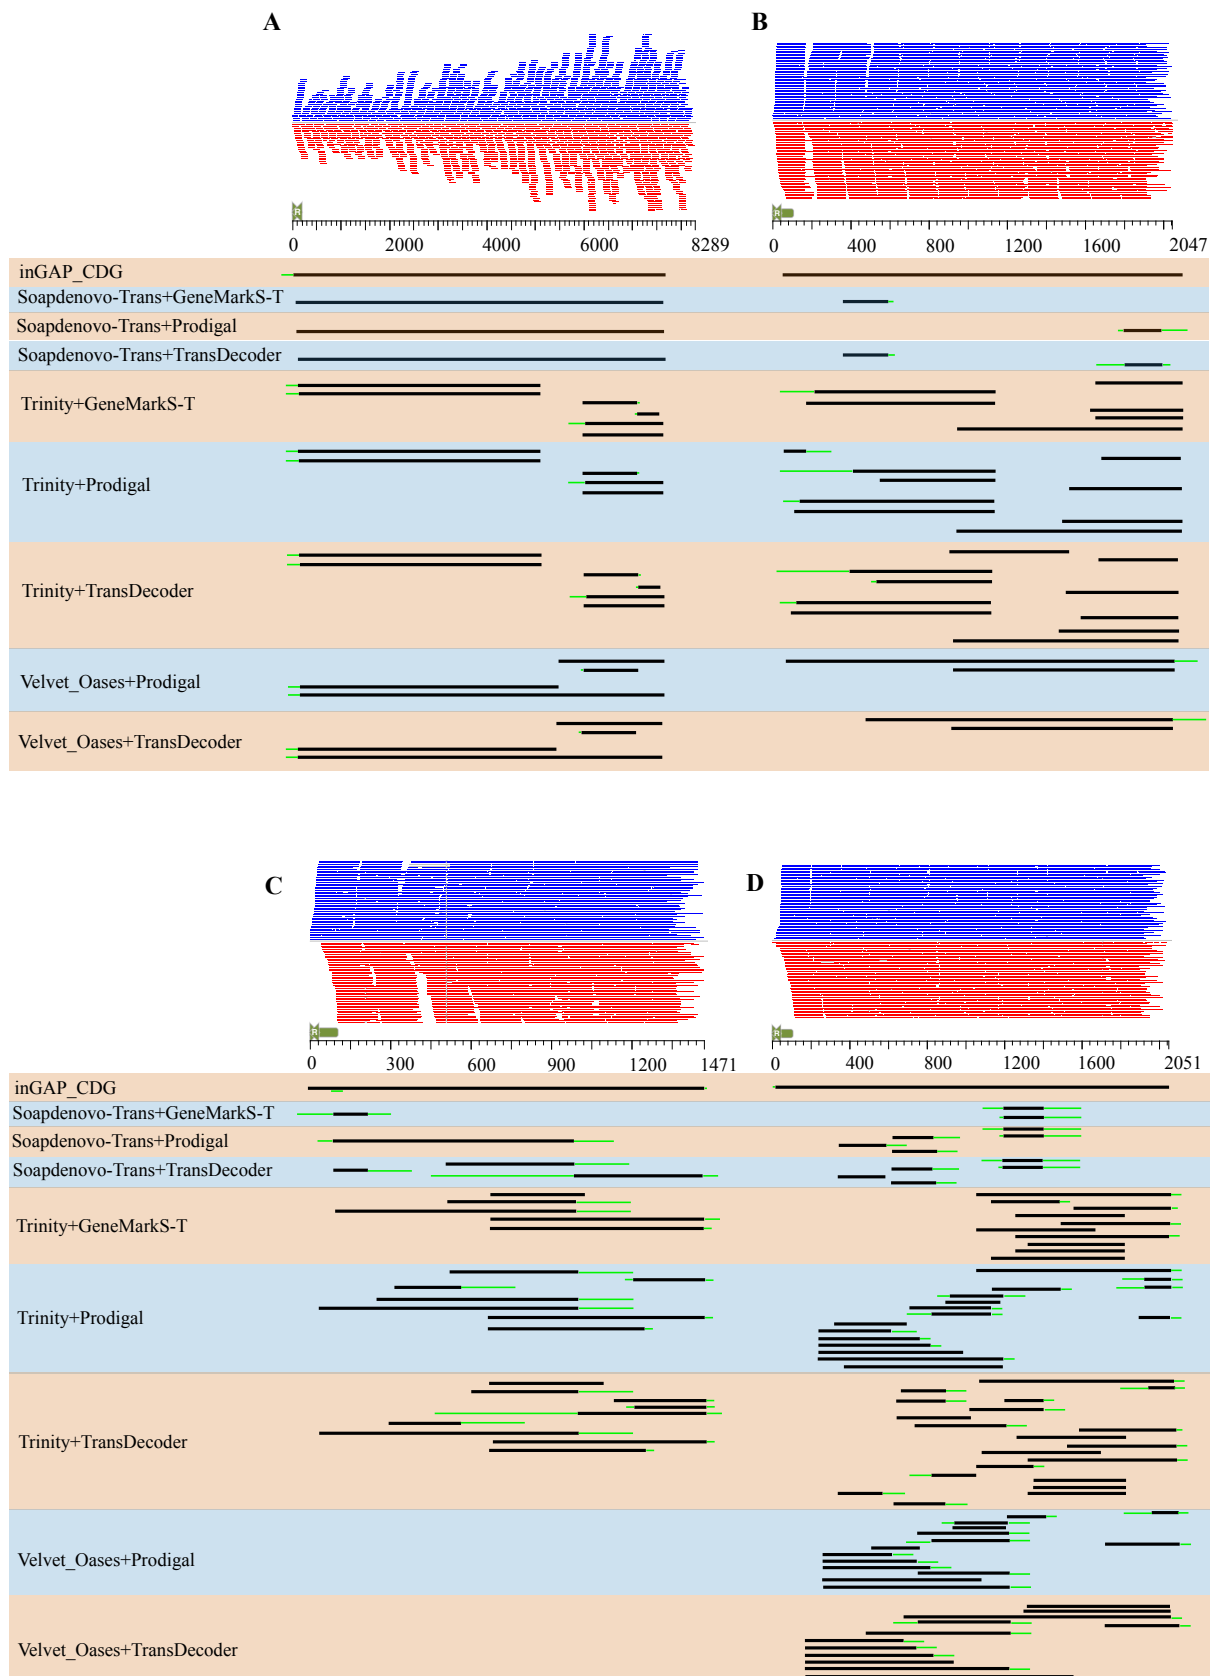

Figure S6

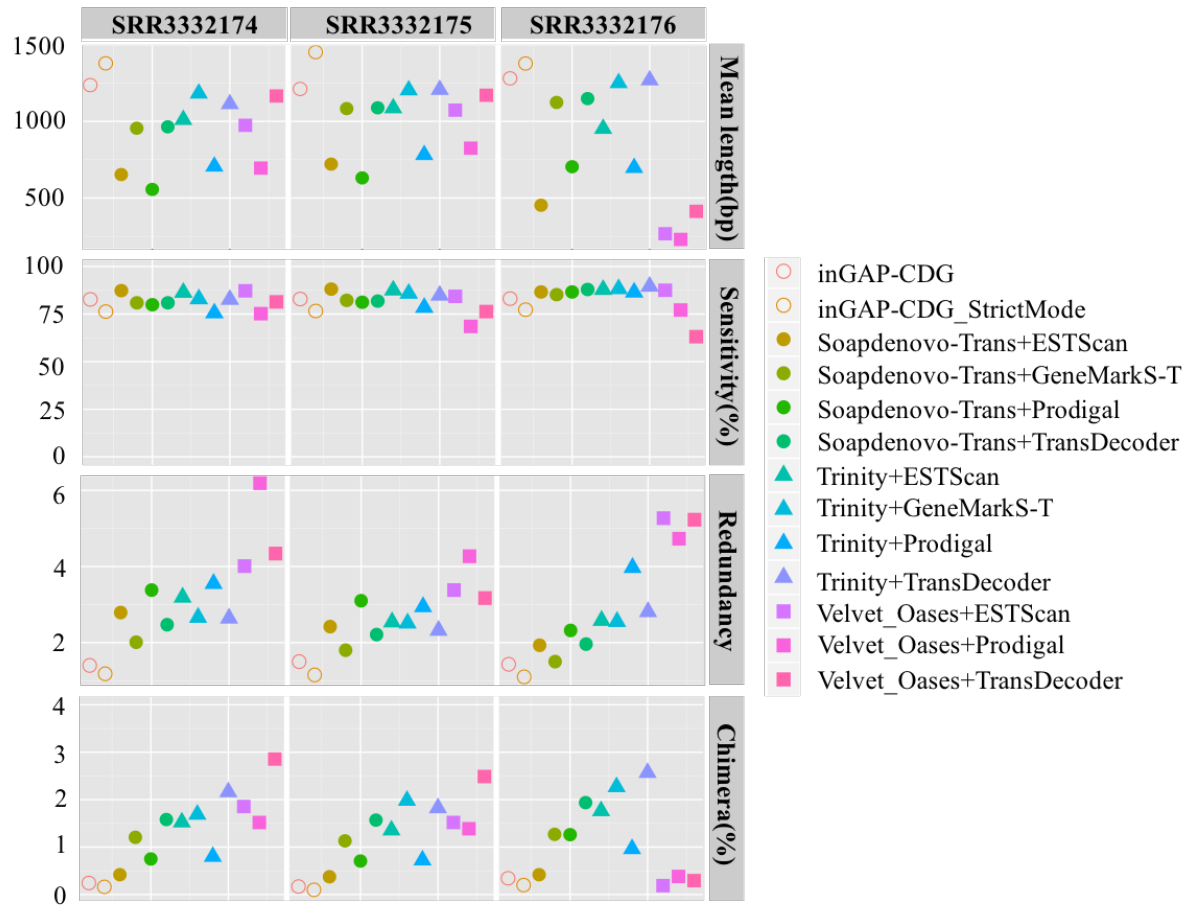

Figure S7

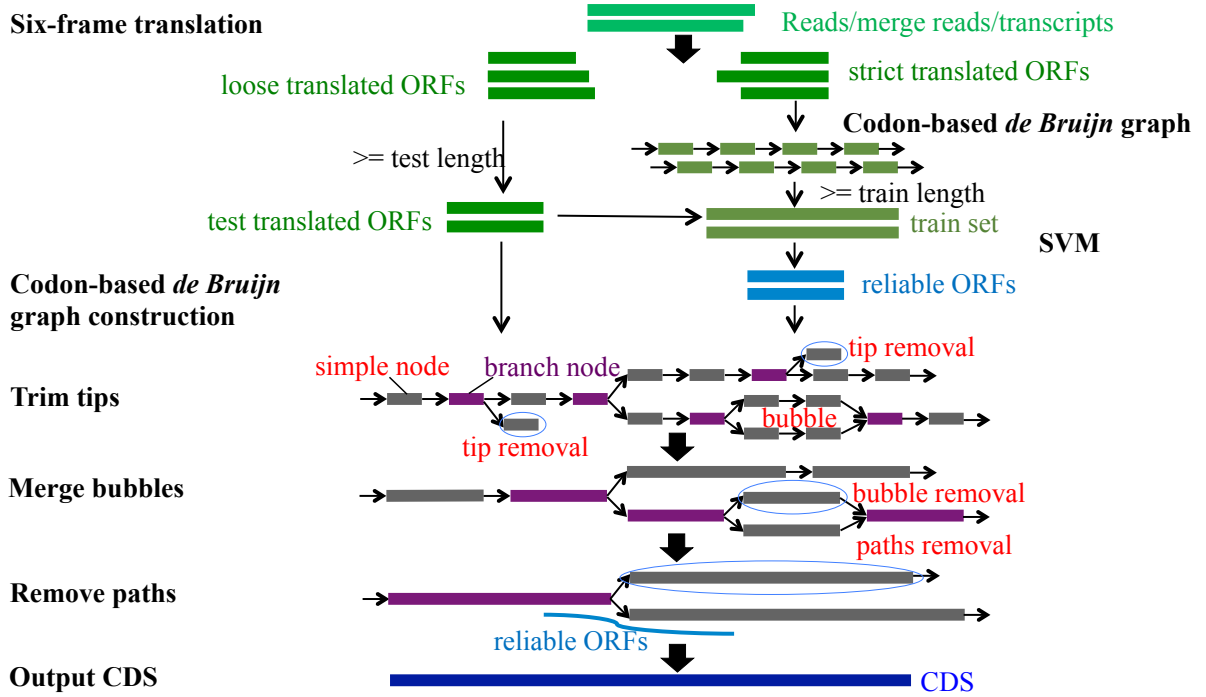

Figure S8

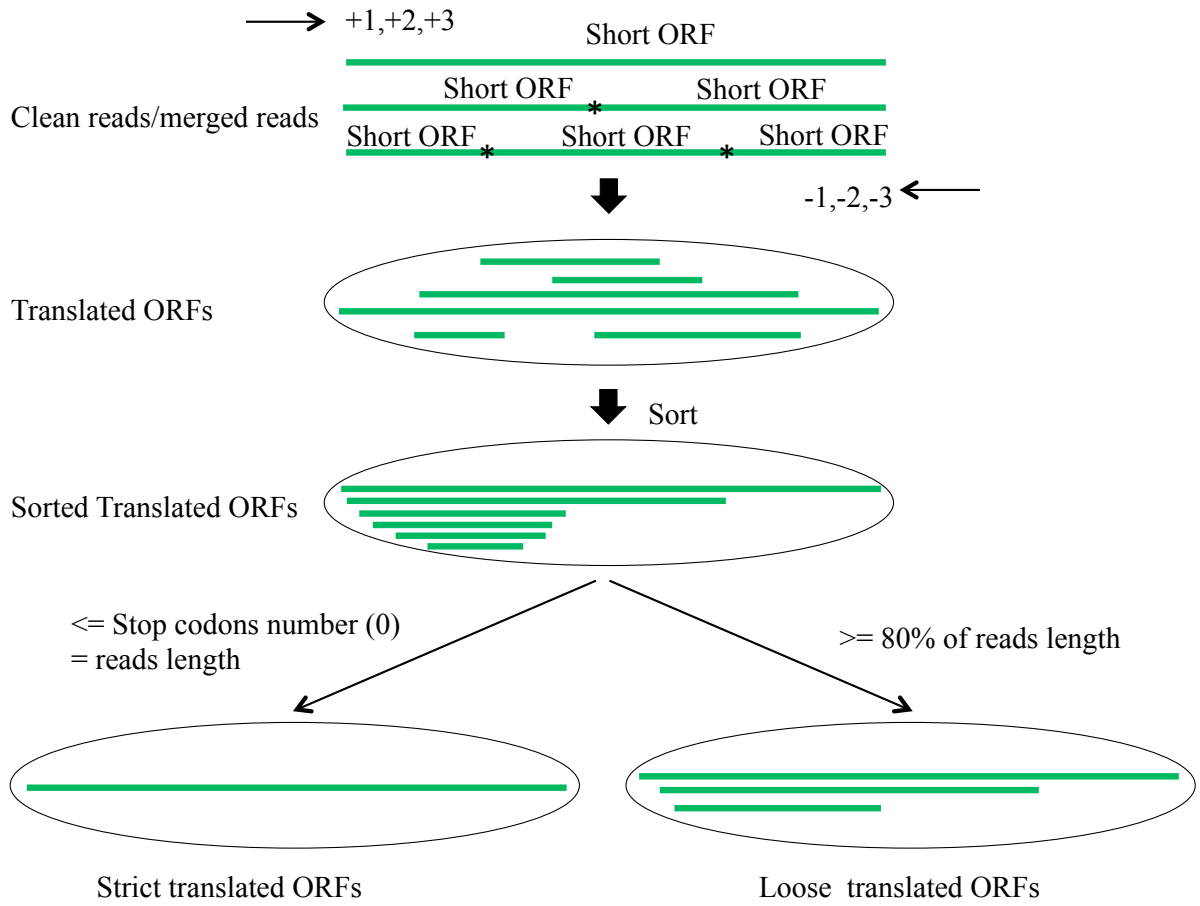

**Figure S9**

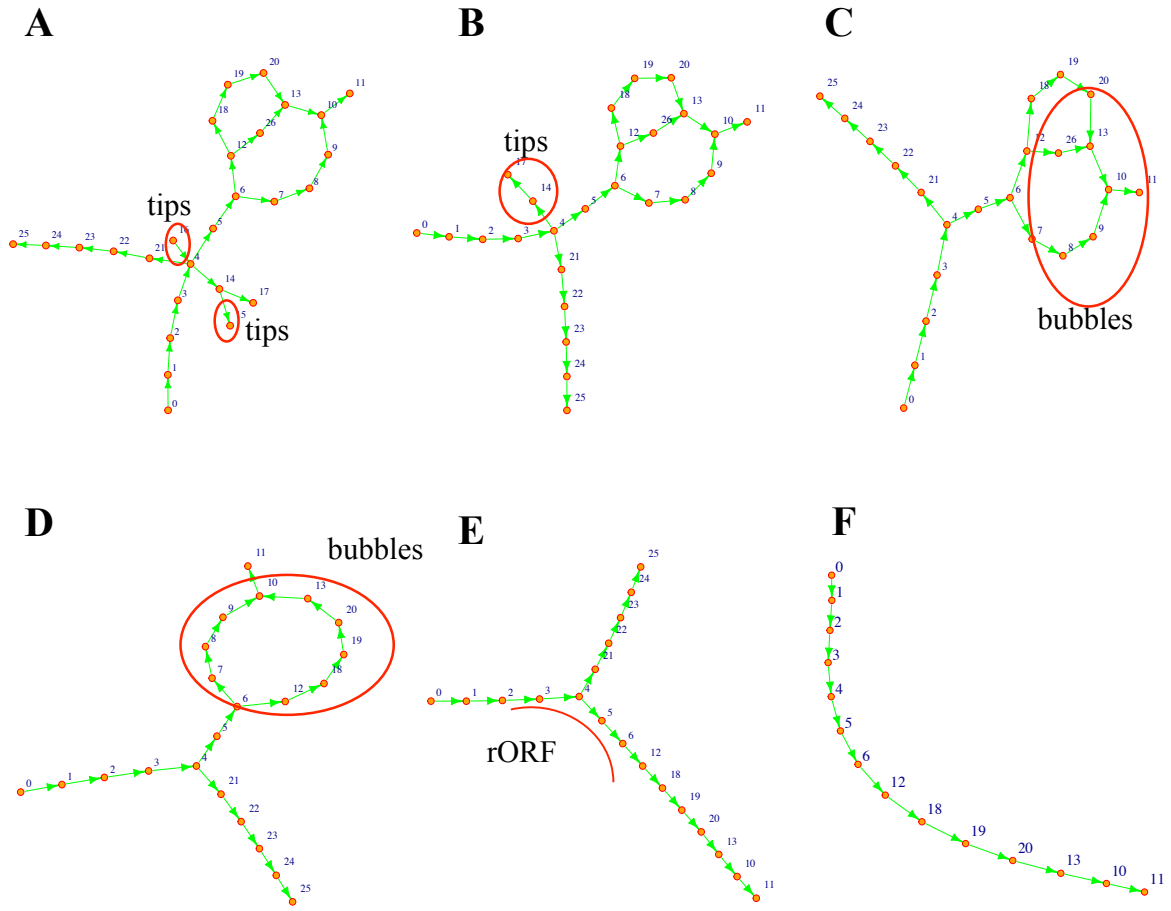

Figure S10

**Table S1. Comparison of the node and edge numbers between traditional *de Bruijn* graph and codon-based *de Bruijn* graph.**

|                          | Data    |            | Node number |             | Edge number |             |
|--------------------------|---------|------------|-------------|-------------|-------------|-------------|
|                          | size(M) | number     | k-1         | k-3         | k-1         | k-3         |
| human ccds               | 48      | 28,708     | 31,310,227  | 10,448,659  | 31,324,270  | 10,474,630  |
| mouse ccds               | 37      | 23,089     | 31,489,646  | 10,493,453  | 31,503,979  | 10,518,294  |
| fruit fly ccds           | 66      | 29,375     | 22,264,470  | 7,425,159   | 22,263,472  | 7,433,273   |
| ERR188040_1.clean.fastq  | 3,200   | 24,025,738 | 181,805,822 | 94,908,406  | 182,169,581 | 96,359,260  |
| ERR1161592_1.clean.fastq | 3,500   | 20,996,217 | 201,359,022 | 96,633,034  | 202,425,673 | 99,713,421  |
| SRR1045067_1.clean.fastq | 2,900   | 16,267,330 | 286,703,917 | 150,956,431 | 289,682,788 | 158,070,462 |

**Table S2. Datasets used in this study.**

| Species                                     | Sequence number | Description                                               |
|---------------------------------------------|-----------------|-----------------------------------------------------------|
| <i>Homo sapiens</i>                         | 28,708          | CDS                                                       |
| <i>Homo sapiens</i> (chr3)                  | 1,629           | CDS                                                       |
| <i>Homo sapiens</i> (chr3)                  | 1,685,395       | 100bp, single-end reads                                   |
| <i>Homo sapiens</i> (chr3)                  | 1,477,272       | 300bp, single-end reads                                   |
| <i>Homo sapiens</i> (chr3)                  | 1,277,811       | 500bp, single-end reads                                   |
| <i>Homo sapiens</i> (chr3)                  | 1,012,378       | 800bp, single-end reads                                   |
| <i>Homo sapiens</i> (chr3)                  | 2*1,500,000     | 2*200bp, simulated paired-end reads, 0.5% sequenced error |
| <i>Homo sapiens</i> (chr3)                  | 2*1,500,000     | 2*200bp, simulated paired-end reads, 1% sequenced error   |
| <i>Homo sapiens</i> (chr3)                  | 2*1,500,000     | 2*200bp, simulated paired-end reads, 2% sequenced error   |
| <i>Homo sapiens</i> (chr19)                 | 1,936           | CDS                                                       |
| <i>Homo sapiens</i> (chr20)                 | 787             | CDS                                                       |
| <i>Homo sapiens</i> (ERR188040)             | 2*27,256,165    | 2* 75bp, paired-end reads                                 |
| <i>Homo sapiens</i> (ERR1161592)            | 2*24,418,242    | 2*100bp, paired-end reads                                 |
| <i>Homo sapiens</i> (SRR1045067)            | 2*19,169,171    | 2*150bp, paired-end reads                                 |
| <i>Homo sapiens</i> (SRR3151756)            | 2*45,497,333    | 2*100bp, paired-end reads                                 |
| <i>Homo sapiens</i> (SRR2922678)            | 2*45,199,432    | 2*100bp, paired-end reads                                 |
| <i>Drosophila melanogaster</i> (SRR3332174) | 2*28,858,597    | 2*100bp, paired-end reads                                 |
| <i>Drosophila melanogaster</i> (SRR3332175) | 2*43,304,279    | 2*100bp, paired-end reads                                 |
| <i>Drosophila melanogaster</i> (SRR3332176) | 2*102,788,015   | 2*100bp, paired-end reads                                 |
